# Supplementary material
Source: MDPI journal article supplement (https://www.mdpi.com/2072-4292/15/2/392)
Supplement: s1 [file s1]

## SUPPLEMENTAL MATERIAL 3

As in Fig. 8 in the paper for all case studies listed in Supplemental Material S1 and in Figure 7. However, note that LMR data is only available in level-2 products after June 2021.
