# Supplementary material
Source: MDPI journal article supplement (https://www.mdpi.com/2072-4292/15/2/392)
Supplement: s1 [file s1]

## SUPPLEMENTAL MATERIAL 2

As in Figs. 3 to 5 in the paper for all case studies listed in Supplemental Material S1 and in Figure 7.
